# Supplementary material
Source: PubMed Central journal article supplement (PMC5653425)
Supplement: NIHMS900060-supplement-Supp_TableS3.pdf [file NIHMS900060-supplement-Supp_TableS3.pdf]

**Table S3 Strains, plasmids and primers used in this study**

| Strain                                                                     | Genotype / Relevant characteristics                                                                                                                   | Reference     |
|----------------------------------------------------------------------------|-------------------------------------------------------------------------------------------------------------------------------------------------------|---------------|
| <i>E. coli</i> BL21(DE3)                                                   | F <sup>-</sup> <i>ompT gal dcm lon hsdSB (rB<sup>-</sup> mB<sup>-</sup>)</i> λ (DE3 ( <i>lacI lacUV5-T7 gene 1 ind1 sam7 nin5</i> ))                  | Novagen       |
| <i>E. coli</i> BL21(DE3) <i>hsIO::kan</i>                                  | F <sup>-</sup> <i>ompT gal dcm lon hsdSB (rB<sup>-</sup> mB<sup>-</sup>)</i> λ (DE3 ( <i>lacI lacUV5-T7 gene 1 ind1 sam7 nin5</i> )) <i>hsIO::kan</i> | Cremers 2010  |
| <i>E. coli</i> S17.1                                                       | <i>TpR SmR recA, thi, pro, hsdR-M+RP4</i> : 2-Tc:Mu: Km Tn7 λpir                                                                                      | Hmelo 2015    |
| <i>P. aeruginosa</i> PA14                                                  | Wild-type PA14                                                                                                                                        | Liberati 2006 |
| <i>P. aeruginosa</i> PA14 <i>hsIO</i> <sup>-</sup>                         | PA14 Δ <i>hsIO</i>                                                                                                                                    | This study    |
| <i>P. aeruginosa</i> PA14 <i>ppk</i> <sup>-</sup>                          | PA14 Δ <i>ppk</i>                                                                                                                                     | This study    |
| <i>P. aeruginosa</i> PA14 <i>ppk</i> <sup>-</sup> <i>hsIO</i> <sup>-</sup> | PA14 Δ <i>ppk</i> Δ <i>hsIO</i>                                                                                                                       | This study    |

| Plasmid                                      | Description                                                                                                                       | Source       |
|----------------------------------------------|-----------------------------------------------------------------------------------------------------------------------------------|--------------|
| pET11a                                       | T7-RNA polymerase-based expression vector, Ap <sup>R</sup>                                                                        | Novagen      |
| pET11a <i>E. coli</i> <i>hsIO</i>            | <i>E. coli</i> <i>hsIO</i> gene cloned into <i>NdeI</i> and <i>BamHI</i> sites of pET11a, Ap <sup>R</sup>                         | Cremers 2010 |
| pET11a <i>P. aeruginosa</i> PA14 <i>hsIO</i> | PA14 <i>hsIO</i> gene cloned into <i>NdeI</i> and <i>BamHI</i> sites of pET11a, Ap <sup>R</sup>                                   | This study   |
| pEX18Gm                                      | Gm <sup>r</sup> , <i>oriT</i> , <i>sacB</i> , <i>lacZα</i>                                                                        | Hmelo 2015   |
| pEX18Gm <i>hsIO</i> updownSOE                | Fusion of 500 bp upstream and downstream regions of PA14 <i>hsIO</i> cloned into <i>BamHI</i> and <i>HindIII</i> sites of pEX18Gm | This study   |
| pEX18Gm <i>ppk</i> updownSOE                 | Fusion of 500 bp upstream and downstream region of PA14 <i>ppk</i> cloned into <i>BamHI</i> and <i>HindIII</i> sites of pEX18Gm   | This study   |
| pET21b <i>ppk</i>                            | T7-RNA polymerase-based expression vector; <i>ppk</i> cloned into <i>NdeI</i> and <i>HindIII</i> sites of pET21b, Ap <sup>R</sup> | Gray 2014    |

| Primer                    | Sequence (5' - 3')                         |
|---------------------------|--------------------------------------------|
| <b>Cloning primers</b>    |                                            |
| T7fw                      | TAATACGACTCACTATAGGG                       |
| T7rv                      | GCTAGTTATTGCTCAGCGG                        |
| NdeI_fw PA14 <i>hsIO</i>  | ATCCATATGTCCCATTTCAGATCAGAGCCAG            |
| BamHI_rv PA14 <i>hsIO</i> | GTAGGATCCTCAGTGGCGGGTCTC                   |
| M13F-21                   | GTAAAACGACGGCCAG                           |
| M13R                      | CAGGAAACAGCTATGAC                          |
| BGhsIOUpFwBamHI           | ATCCGGGGATCCCAGGTGGTGGGCGATCTTG            |
| BGhsIODownrvHindIII       | ATCCGGAAGCTTGCTCGATGAACAGGCAACGG           |
| BGhsIOUpvSOE              | GAAAAATCGTCAGTGGCGGGTTGAATGGGACATGCGGGACAC |

|                    |                                              |
|--------------------|----------------------------------------------|
| BGhslODownfwSOE    | ACCCGCCACTGACGATTTTTTC                       |
| SeqhslOfw          | CGGTCCTTGATTTCCCACAC                         |
| SeqhslOrv          | TCGAAGTTGGCGACATTGAG                         |
| BGppkUpFwBamHI     | ATCCGGGGATCCATGGACGGTTCGCATCGGTG             |
| BGppkDownrvHindIII | ATCCGGAAGCTTGAGCAGGCTTCGCGGGTG               |
| BGppkUpvrSOE       | CTACAGCCTCAACGTGCGGTCTGCGTATTCATTCATCTTCCCGA |
| BGppkDownfwSOE     | ACCGCACGTTGAGGCTGTAG                         |
| Seqppkfw           | CGGCATCCTGGATGACGATG                         |
| Seqppkrv           | AAGGCGTTCTCTACGACCTG                         |

***qPCR primers***

|                 |                           |
|-----------------|---------------------------|
| PA14_16SrRNA_fw | TATCAGATGAGCCTAGGTCCGATTA |
| PA14_16SrRNA_rv | TTTACAATCCGAAGACCTTCTTCAC |
| PA14_ibpA_fw    | TTCCGTCATTCCGTAGG         |
| PA14_ibpA_rv    | AGGTCTTCTTCCTGG           |
| PA14_rpoH_fw    | AACCTGTACATGCCTTGTTCC     |
| PA14_rpoH_rv    | ATAACTCTTGGCGATATGAACAACG |
| PA14_dnaK_fw    | GGTAACGTCAAGGTCATCGAGAA   |
| PA14_dnaK_rv    | GTCTTTCTGTACCACGTTCTCTTCG |
